# Supplementary material
Source: publisher figshare collection journal article supplement (https://acs.figshare.com/ndownloader/files/5763264)
Supplement: Supplementary file 1 [file 5763264]

## Experimental Section

**General Procedures.** Acetonitrile was distilled from  $P_2O_5$ , and dichloromethane and dichloromethane- $d_2$  were distilled from  $CaH_2$ . Trifluoroethanol (TFE) and TFE- $d_3$  were distilled from  $CaSO_4$  and a small amount of  $NaHCO_3$ .  $^1H$ ,  $^{13}C\{^1H\}$  and  $^{19}F$  NMR spectra were recorded on a Bruker Advance DXP 200 instrument.

$^1H$  and  $^{13}C$  chemical shifts are reported in ppm relative to tetramethylsilane, with the residual solvent proton resonance as internal standards.  $^{19}F$  chemical shifts are reported in ppm relative to  $CFCl_3$ . For TFE- $d_3$ , the solvent fluorine resonance was used as internal standard ( $\delta -77.72$ ). Elemental analyses were performed by Ilse Beetz Mikroanalytisches Laboratorium, Kronach, Germany.  $Pt(CH_3)_4(\mu-SMe_2)_2$ <sup>1</sup> and  $Pt(C_6H_5)_2(SMe_2)_2$ <sup>2</sup> were prepared as described in the literature.

**N-N = ArN=CMeCMe=NAr, Ar = 3,5-(CF<sub>3</sub>)<sub>2</sub>C<sub>6</sub>H<sub>3</sub>.** To a solution of 3,5-bis(trifluoromethyl)aniline (37.20 g, 162.4 mmol) and 2,3-butanedione (6.99 g, 81.2 mmol) in methanol (10 mL) was added formic acid (1 mL). The mixture was stirred for 4 days under slow precipitation of an off-white material. After filtration and washing with cold methanol, the crude product was recrystallized from an ether/pentane mixture to yield the product as pale yellow crystals (10.89 g, 26 %).  $^1H$  NMR (200 MHz, chloroform- $d$ )  $\delta$  2.16 (s, 6 H, NCM<sub>2</sub>MeN), 7.22 (s, 4 H, ArH<sub>o</sub>), 7.65 (s, 2 H, ArH<sub>p</sub>).  $^{13}C\{^1H\}$  NMR (50 MHz, chloroform- $d$ )  $\delta$  15.7 (NCMeCMeN), 117.8 ( $^3J(^{19}F-C) = 3.8$  Hz, ArC<sub>p</sub>), 118.9 (ArC<sub>o</sub>), 123.1 ( $^1J(^{19}F-C) = 273$  Hz, CF<sub>3</sub>), 132.7 ( $^2J(^{19}F-C) = 33.5$  Hz, ArC<sub>m</sub>), 151.6 (ArC<sub>ipso</sub>), 169.7 (NCMeCMeN).  $^{19}F$  NMR (188 MHz, chloroform- $d$ )  $\delta$  -63.5 (s, ArCF<sub>3</sub>). Anal. Calcd for C<sub>20</sub>H<sub>12</sub>F<sub>12</sub>N<sub>2</sub>: C, 47.26; H, 2.38; N, 5.51. Found: C, 47.84; H, 3.43; N, 6.03. HRMS:  $m/z$  508.0797 ( $M^+$ ); calcd for C<sub>20</sub>H<sub>12</sub>F<sub>12</sub>N<sub>2</sub>, 508.0809.

**(N-N)Pt(CH<sub>3</sub>)<sub>2</sub> (1).** The diimine ligand (1.782 g, 3.505 mmol) was added to a solution of  $Pt(CH_3)_4(\mu-SMe_2)_2$  (1.007 g, 1.753 mmol) in toluene (180 mL) and the mixture was stirred overnight. The solvent was removed and the residue was recrystallized from a dichloromethane/pentane mixture. The product was obtained after drying *in vacuo*. Dark violet microcrystals (2.351 g, 91%).  $^1H$  NMR (200 MHz, dichloromethane- $d_2$ )  $\delta$  1.14 (s,  $^2J(^{195}Pt-H) = 87.2$  Hz, 6 H, PtMe), 1.35 (s, 6 H, NCM<sub>2</sub>MeN), 7.57 (s, 4 H, ArH<sub>o</sub>), 7.89 (s, 2 H, ArH<sub>p</sub>).  $^{19}F$  NMR (188 MHz, dichloromethane- $d_2$ )  $\delta$  -63.14 (s, ArCF<sub>3</sub>). Anal. Calcd for C<sub>22</sub>H<sub>18</sub>F<sub>12</sub>N<sub>2</sub>Pt: C, 36.03; H, 2.47; N, 3.82. Found: C, 37.21; H, 3.49; N, 4.04.

**[(N-N)Pt(CH<sub>3</sub>)(OH<sub>2</sub>)]<sup>+</sup>(BF<sub>4</sub><sup>-</sup>) (2(BF<sub>4</sub><sup>-</sup>)).** To a solution of **1** (123 mg, 0.168 mmol) in dichloromethane (50 mL) was added H<sub>2</sub>O (9  $\mu$ L, 0.5 mmol). The solution was cooled to -40 °C and a 54% solution of HBF<sub>4</sub> in ether (23  $\mu$ L, 0.17 mmol) was added with a syringe. The reaction mixture was stirred for 15 min, during which the dark purple solution was transformed to an orange suspension. The solvent was slowly removed by vacuum transfer while the solution was maintained at -40 °C. The residue was dried *in vacuo* for 15 min at ambient temperature to give the product as an orange powder, more than 95 % pure according to NMR. <sup>1</sup>H NMR (200 MHz, TFE-*d*<sub>3</sub>)  $\delta$  0.79 (s, <sup>2</sup>*J*(<sup>195</sup>Pt-H) = 73.3 Hz, 3 H, PtMe), 1.80 (s, 3 H, NCMeC'MeN), 2.05 (s, 3 H, NCMeC'MeN), 7.58 (s, 2 H, ArH<sub>o</sub>), 7.71, (s, 2 H, Ar'H<sub>o</sub>) 8.00 (s, 2 H, ArH<sub>p</sub> and Ar'H<sub>p</sub>). <sup>1</sup>H NMR (200 MHz, dichloromethane-*d*<sub>2</sub> with ca. 250 of TFE added, -20 °C)  $\delta$  0.62 (s, <sup>2</sup>*J*(<sup>195</sup>Pt-H) = 73.5 Hz, 3 H, PtMe), 1.81 (s, 3 H, NCMeC'MeN), 2.07 (s, 3 H, NCMeC'MeN), 6.51 (br s, PtOH<sub>2</sub>), 7.58 (s, 2 H, ArH<sub>o</sub>), 7.70, (s, 2 H, Ar'H<sub>o</sub>) 7.96 (s, 2 H, ArH<sub>p</sub> and Ar'H<sub>p</sub>). <sup>19</sup>F NMR (188 MHz, TFE-*d*<sub>3</sub>)  $\delta$  -151.83 (s, 4 F, BF<sub>4</sub><sup>-</sup>), -63.64 (s, 6 F, ArCF<sub>3</sub>), -63.52 (s, 6 F, Ar'CF<sub>3</sub>). Anal. Calcd for C<sub>21</sub>H<sub>17</sub>BF<sub>16</sub>N<sub>2</sub>OPT: C, 30.64; H, 2.08; N, 3.40. Found: C, 30.89; H, 2.68; N, 3.65.

**[(N-N)Pt(CH<sub>3</sub>)(NCMe)]<sup>+</sup>(BF<sub>4</sub><sup>-</sup>).** To a solution of **1** (300 mg, 0.409 mmol) in 40 mL dichloromethane and 3 mL acetonitrile was added a 54% solution of HBF<sub>4</sub> in ether (56  $\mu$ L, 0.41 mmol), and the reaction mixture was stirred for 15 min. The solvent was removed and the residue was washed with several portions of diethyl ether. The product was obtained as an orange powder (301 mg, 87 %) after recrystallization from acetone/diethyl ether and drying *in vacuo*. <sup>1</sup>H NMR (200 MHz, TFE-*d*<sub>3</sub>)  $\delta$  0.71 (s, <sup>2</sup>*J*(<sup>195</sup>Pt-H) = 74.5 Hz, 3 H, PtMe), 2.02 (s, 3 H, NCMeC'MeN), 2.10 (s, 3 H, PtNCMe), 2.13 (s, 3 H, NCMeC'MeN), 7.59 (s, 2 H, ArH<sub>o</sub>), 7.74, (s, 2 H, Ar'H<sub>o</sub>) 8.01 (s, 1 H, ArH<sub>p</sub>) 8.04 (s, 1 H, Ar'H<sub>p</sub>). <sup>19</sup>F NMR (188 MHz, TFE-*d*<sub>3</sub>)  $\delta$  -152.06 (s, 4 F, BF<sub>4</sub><sup>-</sup>), -63.64 (s, 6 F, ArCF<sub>3</sub>), -63.41 (s, 6 F, Ar'CF<sub>3</sub>). Anal. Calcd for C<sub>23</sub>H<sub>18</sub>BF<sub>16</sub>N<sub>3</sub>Pt: C, 32.64; H, 2.14; N, 4.97. Found: C, 32.77; H, 6.35; N, 5.40.

**(N-N)Pt(C<sub>6</sub>H<sub>5</sub>)<sub>2</sub>.** A solution of Pt(C<sub>6</sub>H<sub>5</sub>)<sub>2</sub>(SMe<sub>2</sub>)<sub>2</sub> (452 mg, 0.954 mmol) and **1** (485 mg, 0.954 mmol) in toluene (50 mL) was stirred at 45 °C for 20 h. The solution was removed and the residue was recrystallized from a dichloromethane/pentane mixture. The product was obtained as dark purple microcrystals (755 mg, 92%). <sup>1</sup>H NMR (200 MHz, dichloromethane-*d*<sub>2</sub>)  $\delta$  1.82 (s, 6 H, NCMeCMeN), 6.42-6.63 (m, 6H, PhH<sub>m</sub> and PhH<sub>p</sub>), 6.73 ("d", <sup>3</sup>*J*(H-H) = 8.3 Hz, <sup>3</sup>*J*(<sup>195</sup>Pt-H) = 71.0 Hz, 4H, PhH<sub>o</sub>), 7.26 (s, 4 H, ArH<sub>o</sub>), 7.60 (s, 2 H, ArH<sub>p</sub>). <sup>19</sup>F NMR

(188 MHz, dichloromethane- $d_2$ )  $\delta$  -63.21 (s,  $\text{ArCF}_3$ ). Anal. Calcd for  $\text{C}_{32}\text{H}_{22}\text{F}_{12}\text{N}_2\text{Pt}$ : C, 44.82; H, 2.59; N, 3.27. Found: C, 45.10; H, 2.97; N, 4.13.

$[(\text{N-N})\text{Pt}(\text{C}_6\text{H}_5)(\text{NCMe})]^+(\text{BF}_4^-)$ . To a solution of  $(\text{N-N})\text{Pt}(\text{C}_6\text{H}_5)_2$  (199.2 mg, 0.232 mmol) in acetonitrile (15 mL) was a 54% solution of  $\text{HBF}_4$  in ether (35  $\mu\text{L}$ , 0.26 mmol) added with a syringe. The mixture was stirred for 20 minutes. The solvent was removed, and the solid was washed with diethyl ether portions and dissolved in a minimum amount of acetone. The product was obtained as orange crystals (192.5 mg, 91 %) by the addition of diethyl ether.  $^1\text{H}$  NMR (200 MHz,  $\text{TFE-}d_3$ )  $\delta$  2.01 (s, 3 H,  $\text{PtNCMe}$ ), 2.14 (s, 3 H,  $\text{NCMeC}'\text{MeN}$ ), 2.28 (s, 3 H,  $\text{NCMeC}'\text{MeN}$ ), 6.65-6.75 (m, 5 H,  $\text{PhH}$ ), 7.27 (s, 2 H,  $\text{ArH}_o$ ), 7.65 (s, 1 H,  $\text{ArH}_p$ ), 7.81 (s, 2 H,  $\text{Ar}'\text{H}_o$ ), 8.07 (s, 1 H,  $\text{Ar}'\text{H}_p$ ).  $^{19}\text{F}$  NMR (188 MHz,  $\text{TFE-}d_3$ )  $\delta$  -152.01 (s, 4 F,  $\text{BF}_4^-$ ), -63.63 (s, 6 F,  $\text{ArCF}_3$ ), -63.37 (s, 6 F,  $\text{Ar}'\text{CF}_3$ ). Anal. Calcd for  $\text{C}_{28}\text{H}_{20}\text{BF}_{16}\text{N}_3\text{Pt}$ : C, 37.02; H, 2.22; N, 4.63. Found: C, 37.75; H, 2.58; N, 4.74.

<sup>1</sup> Scott, J.D.; Puddephatt, R.J. *Organometallics* **1983**, 2, 1643.

<sup>2</sup> Hadj-Bagheri, N.; Puddephatt, R.J. *Polyhedron* **1988**, 7, 2695.
